# Supplementary material for: Hierarchical, core–shell meso-ZSM-5@mesoporous aluminosilicate-supported Pt nanoparticles for bifunctional hydrocracking
Source: Royal Society of Chemistry journal article supplement (doi:10.1039/c4ta02740j), 2014-01-01
Supplement: c4ta02740j1.pdf [file c4ta02740j1.pdf]

## Supplementary Materials

Hierarchical core/shell meso-ZSM-5@mesoporous aluminosilicate-supported Pt  
nanoparticles for bifunctional hydrocracking

Darui Wang, Le Xu, Peng Wu\*

*Shanghai Key Laboratory of Green Chemistry and Chemical Processes, Department  
of Chemistry, East China Normal University, North Zhongshan Rd. 3663, Shanghai  
200062, P. R. China*

*E-mail: pwwu@chem.ecnu.edu.cn*

*Tel/Fax: 86-21-62232292*

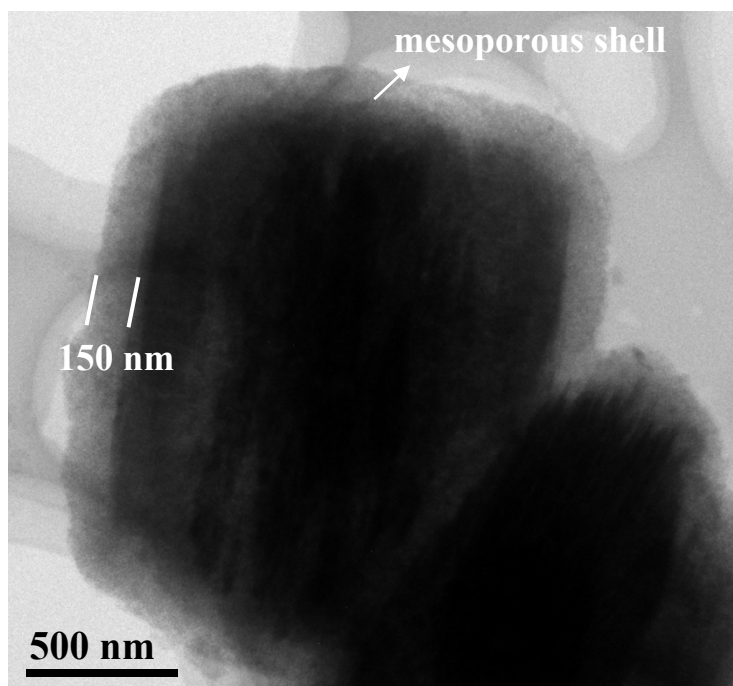

**Fig. S1** TEM image of core-shell structured  $MZ_{AT0.2-PI0.02}@MSA$ , showing a uniform core-shell structure with a shell thickness of 150 nm.

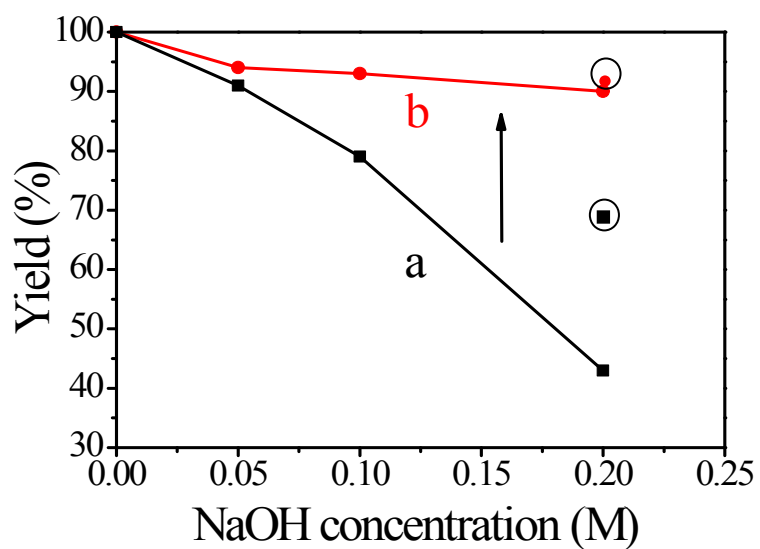

**Fig. S2** Dependence of product yield on NaOH concentration for  $MZ_x$  samples (a) and core-shell structured composite materials  $MZ_x@MSA$  (b). The yield is defined as grams of solid after workup per gram of ZSM-5 used. Circled points represent  $MZ_{AT0.2-Pi0.02}$  and  $MZ_{AT0.2-Pi0.02}@MSA$  both synthesized by desilication with 0.2 M NaOH in the presence of piperidine.

**Table S1** Acidity properties and Si/Al molar ratios of different samples

| No. | Samples                         | Si/Al <sup>a</sup>   | Q <sup>b</sup> (mmol g <sup>-1</sup> ) |        |       |
|-----|---------------------------------|----------------------|----------------------------------------|--------|-------|
|     |                                 |                      | Weak                                   | Strong | Total |
| 1   | ZSM-5                           | 38                   | 0.19                                   | 0.28   | 0.47  |
| 2   | MZ <sub>AT0.2-PI0.02</sub>      | 28(63 <sup>c</sup> ) | 0.26                                   | 0.24   | 0.50  |
| 3   | MZ <sub>AT0.2-PI0.02</sub> @MSA | 36                   | 0.14                                   | 0.21   | 0.35  |
| 4   | MZ <sub>AT0.2-PI0.02</sub> &MSA | 35                   | 0.14                                   | 0.22   | 0.36  |
| 5   | MSA                             | 61                   | 0.06                                   | -      | 0.06  |

<sup>a</sup> Si/Al molar ratios measured by ICP. <sup>b</sup> Acidity determined by NH<sub>3</sub>-TPD

measurement. <sup>c</sup>The Si/Al molar ratio of the filtrate obtained from MZ<sub>AT0.2-PI0.02</sub>.

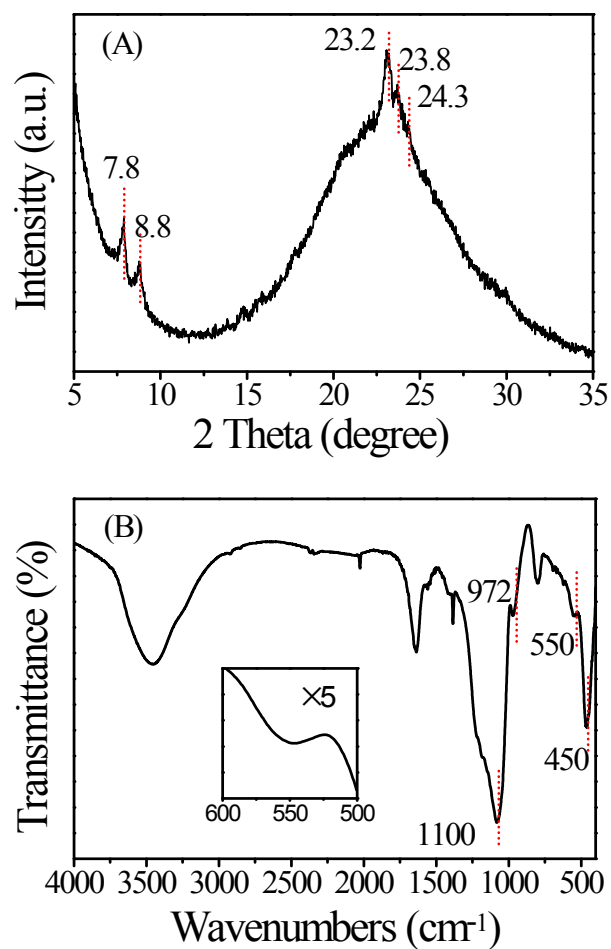

**Fig. S3** XRD pattern (A) and FT-IR spectrum (B) of the MSA material. The pure Al-containing mesoporous silica was self-assembled from the filtrate of ZSM-5 desilication.

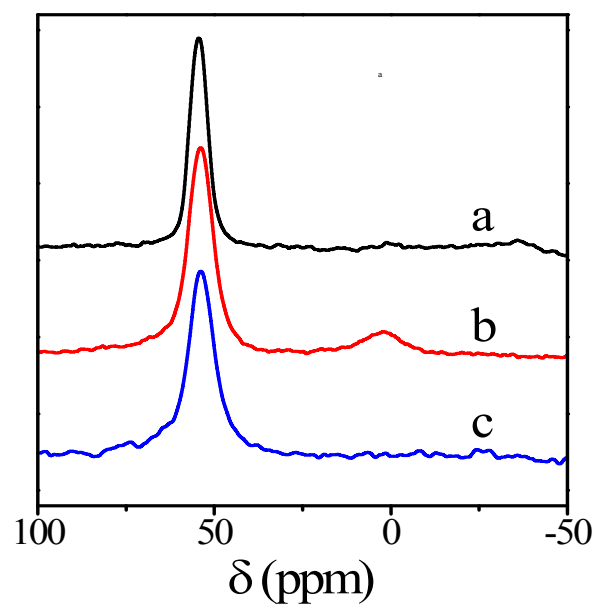

**Fig. S4**  $^{27}\text{Al}$  MAS NMR spectra of ZSM-5 (a),  $\text{MZ}_{\text{AT}0.2\text{-PI}0.02}$  (b),  $\text{MZ}_{\text{AT}0.2\text{-PI}0.02}\text{@MSA}$  (c).

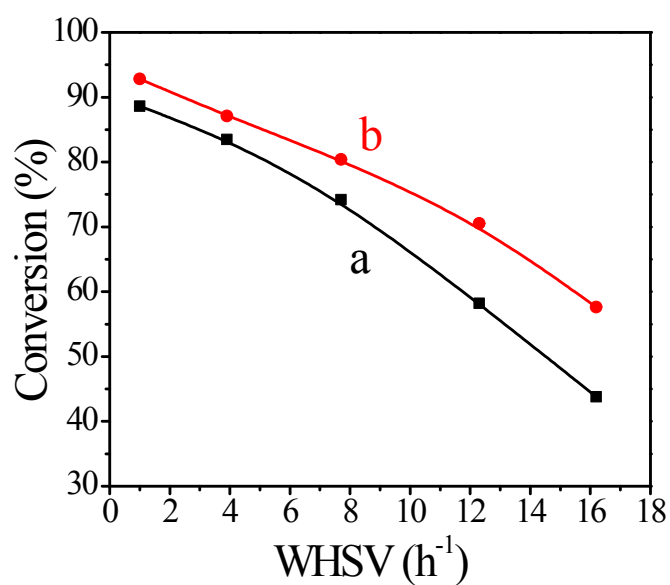

**Fig. S5** The dependence of *n*-hexadecane conversion on space velocity in the hydrocracking over Pt/ZSM-5 (a) and Pt/MZ<sub>AT0.2</sub>-Pt<sub>0.02</sub>@MSA (b). Reaction conditions: catalyst, 0.1 g; WHSV, 1 ~ 16.2 h<sup>-1</sup>; H<sub>2</sub>:C<sub>16</sub> molar ratio, 35; temperature, 573 K; atmospheric pressure. The WHSV was varied by changing the flow rate of C<sub>16</sub> from 0.1 to 1.62 g h<sup>-1</sup>.

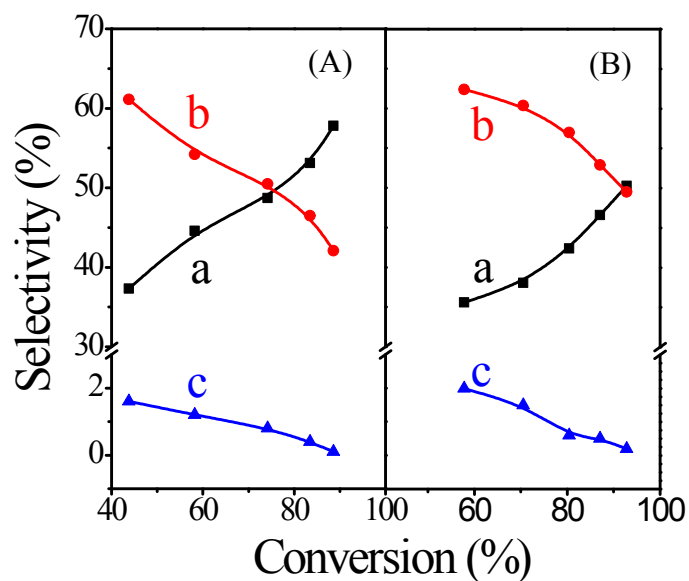

**Fig. S6** The dependence of product selectivity on the *n*-hexadecane conversion of hydrocracking over Pt/ZSM-5 (A) and Pt/MZ<sub>AT0.2-P10.02</sub>@MSA (B). (a) C<sub>1</sub> - C<sub>4</sub> selectivity (a), (b) C<sub>5</sub> - C<sub>11</sub> selectivity, and C<sub>12</sub> - C<sub>15</sub> selectivity. Reaction conditions: catalyst, 0.1 g; WHSV, 1 ~ 16.2 h<sup>-1</sup>; H<sub>2</sub>:C<sub>16</sub> molar ratio, 35; temperature, 573 K; atmospheric pressure. The WHSV was varied by changing the flow rate of C<sub>16</sub> in the range of 0.1 - 1.62 g h<sup>-1</sup>.



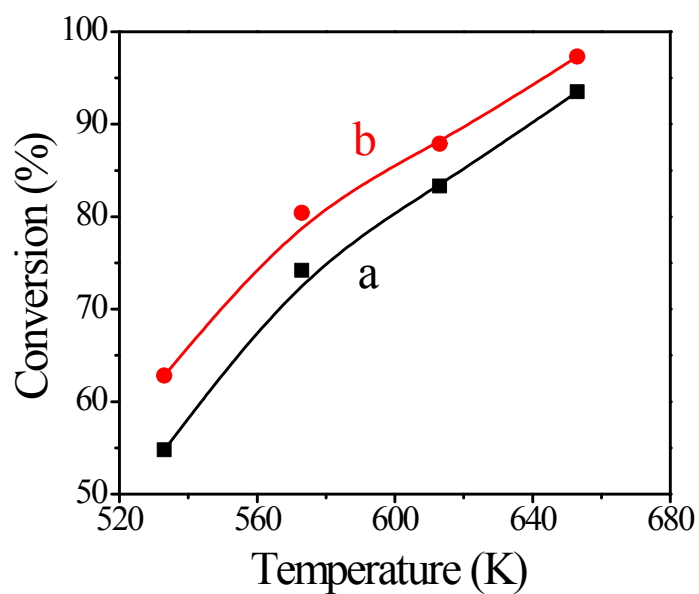

**Fig. S7** The dependence of *n*-hexadecane conversion in the hydrocracking of over Pt/ZSM-5 (a) and Pt/MZ<sub>AT0.2-PI0.02</sub>@MSA (b). Reaction conditions: catalyst, 0.1 g; WHSV, 7.7 h<sup>-1</sup>; H<sub>2</sub>:C<sub>16</sub> molar ratio, 35; H<sub>2</sub> flow rate, 45 mL min<sup>-1</sup>; temperature, 533 ~ 653 K; atmospheric pressure.

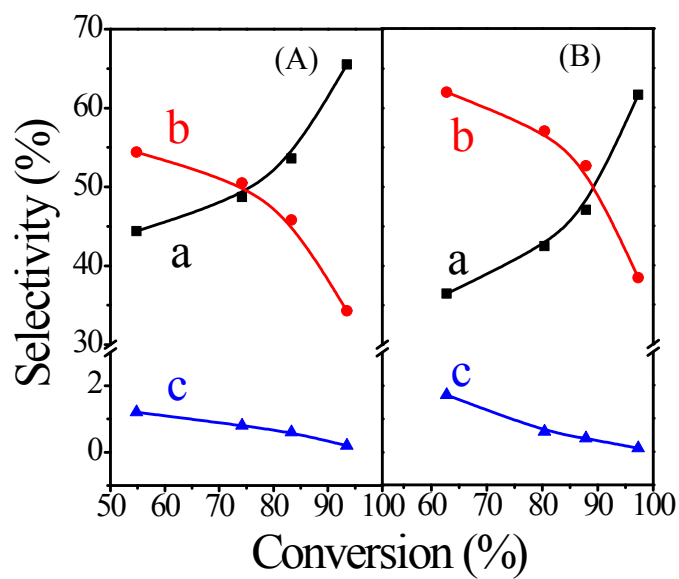

**Fig. S8** The dependence of product selectivity on the *n*-hexadecane conversion of hydrocracking over Pt/ZSM-5 (A) and Pt/MZ<sub>AT0.2-P10.02</sub>@MSA (B). (a) C<sub>1</sub> - C<sub>4</sub> selectivity (a), (b) C<sub>5</sub> - C<sub>11</sub> selectivity, and C<sub>12</sub> - C<sub>15</sub> selectivity. Reaction conditions: catalyst, 0.1 g; WHSV, 7.7 h<sup>-1</sup>; H<sub>2</sub>:C<sub>16</sub> molar ratio, 35; H<sub>2</sub> flow rate, 45 mL min<sup>-1</sup>; temperature, 533 ~ 653 K; atmospheric pressure.
